# Supplementary material for: Hematopoietic stem and progenitor cells improve survival from sepsis by boosting immunomodulatory cells
Source: eLife. 2022 Feb 15;11:e74561. doi: 10.7554/eLife.74561 (PMC8846591; doi:10.7554/eLife.74561)
Supplement: Figure 1—figure supplement 1—source data 1. [file elife-74561-fig1-figsupp1-data1.xlsx]

## Sheet: Sheet1
BM data resprented as Cells/Bone
PB Data represented as % of PB
B- MCP-1 (pg/ml)
Naïve	GAS	Flu	SI
4.23843	81.3419	11.2724	48.3362
5.68131	25.5208	17.2243	67.815
4.05808	75.2998	10.3706	39.9495
1.26251	45.3603		44.729
4.05808	53.1157
C- BM Monocytes
Naïve	GAS	Flu	SI
2.30793e+06	501860	1.17532e+06	682798
2009250	539392	1332950	604490
1.68864e+06	562802	1.11748e+06	490197
1.27785e+06	446823	1308879	550810
1718598	496057	1.05209e+06	541800
D PB Monocytes
Naïve	GAS	Flu	SI
2.08	9.47	5.18	11.4
6.89	12.1	2.76	11.6
2.24	12.9	7.52	5.68
3.67	13.1	7.77	7.98
3.45	8.83	3.39	13
E- BM Bcells
Naïve	GAS	Flu	SI
2.4985e+06	1295604	1.58314e+06	1.20796e+06
1395075	1289484	1584450	1172180
880251	1.56935e+06	1375878	986761
1.05789e+06	1393821	1471041	1.14607e+06
1.25635e+06	1.2147e+06	1.11054e+06	1298600
F- PB B cells
Naïve	GAS	Flu	SI
12.4	6.7	14.4	10.1
30.1	13.4	18.5	12.4
15	10.9	16.3	5.16
22.6	8.17	25	9.2
25	9.12	23.6	18.7
G- BM Granulocytes
Naïve	GAS	Flu	SI
5.44164e+06	930750	3.8122e+06	933814
4602750	1238916	3583875	858690
4.20365e+06	780811	4161192	713014
3404115	746928	3764475	1319721
4207602	934876	2484108	2442400
H- PB Granulocytes
Naïve	GAS	Flu	SI
0.67	18.2	4.88	21.4
1.33	17.4	0.49	16.8
0.63	11.1	8.73	9.62
1.43	22.2	2.51	29.7
0.94	35.5	0.62	29.3
I- BM T cells
Naïve	GAS	Flu	SI
230793	92330.4	135517	131077
146775	104507	168505	112448
97007.2	143793	123046	82124
127785	133380	110038	87518.3
143414	125922	144176	129860
J- PB T cells
Naïve	GAS	Flu	SI
13.2	4.44	13.2	4.53
24.6	6.09	17.5	8.38
9.36	10.7	11.4	3.36
19.1	6.08	18.5	6.32
15.9	7.02	25.3	15
