# Supplementary material for: Hematopoietic stem and progenitor cells improve survival from sepsis by boosting immunomodulatory cells
Source: eLife. 2022 Feb 15;11:e74561. doi: 10.7554/eLife.74561 (PMC8846591; doi:10.7554/eLife.74561)
Supplement: Figure 1—source data 1. [file elife-74561-fig1-data1.xlsx]

## Sheet: Sheet1
BM data resprented as Cells/Bone
PB Data represented as % of PB
B- MCP-1 (pg/mL)
Naïve	GAS
11.8801	36.4033
10.5177	29.4278
11.2262	63.7057
C- BM monocyres
Naïve	GAS
2.94764e+06	2154600
3.38513e+06	864360
3.06768e+06	1.68118e+06
2.73965e+06	2.03809e+06
	1566774
D- BM Granulocytes
Naïve	GAS
4.62897e+06	465034
4817792	184232
4.73041e+06	492642
3.99394e+06	397142
	168043
E- BM B cells
Naïve	GAS
781071	1005480
1.06879e+06	632218
1.52095e+06	847482
1.06615e+06	1.00952e+06
	2329866
F- BM T cells
Naïve	GAS
28731.5	42194.2
69731.2	29635.2
72180.6	48919.7
48411.4	79047.5
	36531
G- PB Monocytes
Naïve	GAS
18.9	41.9
17.2	32.3
26.5	40.7
	35.2
	31.6
H- PB Granulocytes
9.77	21.1
4.15	17.5
5.83	10.5
	16.4
	21.2
I- PB B cells
13.3	4.76
29.3	6.96
17	16.3
	4.87
	12.2
J- PB T cells
Naïve	GAS
6.94	0.9
8.4	1.52
8.29	2.14
	1.69
	1.68
