# Supplementary material for: Hematopoietic stem and progenitor cells improve survival from sepsis by boosting immunomodulatory cells
Source: eLife. 2022 Feb 15;11:e74561. doi: 10.7554/eLife.74561 (PMC8846591; doi:10.7554/eLife.74561)
Supplement: Figure 2—source data 1. [file elife-74561-fig2-data1.xlsx]

## Sheet: Sheet1
C-F represented as Cells/Bone
G-J represented as % of Spleen
C-HSPCs
Naïve	GAS
192198	130931
143451	8817.65
140465	127480
167355	64703.5
188185	82681.2
D- HSC
Naïve	GAS
2049.3	1650.39
2341.09	82.152
2408.9	1167.08
2062.3	839.664
	1102.42
E- MPP3
Naïve	GAS
61693.3	45110.7
48158.6	3067.01
40436.9	42194.2
50713.6	17287.2
54135.5	27560.4
F- MPP4
Naïve	GAS
40337.9	28606.8
32788.8	1643.04
24475	24239.2
29160.3	8890.56
33512.4	16536.2
G- Spleen HSPCs
Naïve	GAS
0.77	1.57
1.24	1.79
0.82	1.28
0.95	1.7
1.67	1.52
H- Spleen CD1150+CD48-
Naïve	GAS
0.063	0.099
0.11	0.096
0.089	0.12
0.069	0.098
0.088	0.098
I- Spleen CD150+CD48+
Naïve	GAS
0.03	0.046
0.045	0.036
0.031	0.036
0.029	0.034
0.037	0.047
J- Spleen CD150-CD48+
Naïve	GAS
0.13	0.21
0.23	0.2
0.16	0.2
0.19	0.21
0.21	0.22
