# Supplementary material for: Hematopoietic stem and progenitor cells improve survival from sepsis by boosting immunomodulatory cells
Source: eLife. 2022 Feb 15;11:e74561. doi: 10.7554/eLife.74561 (PMC8846591; doi:10.7554/eLife.74561)
Supplement: Figure 3—source data 1. [file elife-74561-fig3-data1.xlsx]

## Sheet: Sheet1
Data represented as % of population
C- New HSPCs
Naïve	GAS
1.97	2.16
2.14	4.2
2.11	2.53
1.97	2.86
	3.6
D- New HSCs
Naïve	GAS
1.48	5.69
3.7	5.68
1.9	4.01
1.64	6.97
	6.45
E- New CD41+ HSCs
Naïve	GAS
2.38	2.88
1.41	2.59
1.43	4.84
	4.41
	4.84
F- New BM myeloid
Naïve	GAS
1.43	1.32
1.22	2.16
1	1.16
1.2	1.9
	1.93
G- New BM Monocytes
Naïve	GAS
1.63	2.11
1.75	4.04
1.33	1.44
1.27	3.46
	3.18
H- New BM Granulocytes
Naïve	GAS
1.32	1
1.06	1.99
0.84	0.92
1.22	1.23
	1.36
I- New BM GMP
Naïve	GAS
0.93	1.19
1.41	1.47
1.27	1.67
1.49	1.39
	1.55
J- New BM T cells
Naïve	GAS
0.096	0
0.099	0.051
0.13	0.047
0.19	0.033
	0
K- New bm B cells
Naïve	GAS
5.01	3.38
4.64	3.72
3.3	3.31
3.8	3.72
	4.1
L- New PB Myeloid
Naïve	GAS
1.3	4.82
2	3.57
1.19	3.47
	3.91
M- New PB Monocytes
Naïve	GAS
2.59	6.52
2.27	4.72
1.67	5.61
	4.91
N- New PB Granulocytes
Naïve	GAS
1.13	2.59
1.76	2.39
1.27	1.72
	2.72
O- New PB B cells
Naïve	GAS
3.07	1.27
4.97	1.82
1.34	1.45
	1.96
	2.59
P- New PB T cells
Naïve	GAS
0.096	0
0.099	0.051
0.13	0.047
0.19	0.033
	0
