# Supplementary material for: Hematopoietic stem and progenitor cells improve survival from sepsis by boosting immunomodulatory cells
Source: eLife. 2022 Feb 15;11:e74561. doi: 10.7554/eLife.74561 (PMC8846591; doi:10.7554/eLife.74561)
Supplement: Figure 4—source data 1. [file elife-74561-fig4-data1.xlsx]

## Sheet: Sheet1
BM data resprented as Cells/Bone										Surivival Data
											DPI	GAS Only	GAS + HSPC
										1	3	1
										2	4	1
C- HSPCs										3	4	1
Naïve	GAS	GAS+HSPC								4	4	1
526395	513737	635418								5	4	1
623225	481575	886247								6	4	1
828945	335244	660050								7	4	1
701688	363861	741732								8	21	1
694889	476503	654737								9	13	1
748959	418814	643354								10	13	1
	557056	894792								11	6		1
										12	25		1
D- HSCs										13	32		0
Naïve	GAS	GAS+HSPC								14	32		0
5184.19	5837.92	14981.4								15	3		0	Censored death - maloclusion
7354.06	3218.92	8367.49								16	4		1
7521	4368	7118.19								17	14		1
7153.87	2614.25	10921.2								18	32		0
6912.5	4702.65	7888.4								19	6		0	Censored death - fight wound
7155.66	4027.06	6402.31								20	32		0
	4440.87	9299.8
E- CD41+ HSCs
Naïve	GAS	GAS+HSPC
4984.8	5837.92	14981.4
7229.41	3029.57	8249.64
7357.5	4368	6840.86
13997.5	2454.19	10921.2
6697.24	4558.69	7415.1
6548.69	3926.38	5933.85
6678.62	4129.23	8671.44
F- MPP3
Naïve	GAS	GAS+HSPC
204377	259522	410125
213143	321260	341118
246885	209664	320355
232881	247020	292660
204950	232253	314650
238522	245147	426031
	335013
G- MPP4
Naïve	GAS	GAS+HSPC
8673.55	5201.06	6199.2
3490.06	5238.63	4831.93
3433.5	4368	6563.52
5599	2134.08	4095.45
4414.09	4558.69	9466.08
3759.43	2164.54	2966.93
7155.66	3505.95
H- GMP
Naïve	GAS	GAS+HSPC
133593	261114	238153
114673	245521	293451
122625	192192	256994
147644	179796	257558
118847	217857	224862
128802	207897	340574
	240742
