# Supplementary material for: Hematopoietic stem and progenitor cells improve survival from sepsis by boosting immunomodulatory cells
Source: eLife. 2022 Feb 15;11:e74561. doi: 10.7554/eLife.74561 (PMC8846591; doi:10.7554/eLife.74561)
Supplement: Figure 5—source data 1. [file elife-74561-fig5-data1.xlsx]

## Sheet: Sheet1
BM Data represented as %WBM						L- Survival Curve
						Days Post Infection	Superinfected	Superinfected + HSPCs
b- HSPCs						6	1
SI	SI+HSPC					8	1
2.95	3.93					10	1
2.11	2.57					10	1
2.34	3.59					6	1
2.89	4.97					9	1
2.52	2.62					30		0
	2.45					30		0
	3					8		1
						8		1
C- HSCs						30		0
SI	SI+HSPC					30		0
0.07	0.1					30		0
0.056	0.079					30		0
0.073	0.14
0.073	0.16
0.095	0.07
	0.096
	0.078
D- MPP2
SI	SI+HSPC
0.15	0.15
0.058	0.079
0.076	0.23
0.095	0.23
0.097	0.085
	0.068
	0.12
E- MPP3
SI	SI+HSPC
2.05	2.58
1.3	1.57
1.53	2.4
2	3.46
1.59	1.94
	1.63
	2
F- MPP4
SI	SI+HSPC
0.43	0.49
0.39	0.51
0.41	0.59
0.37	0.81
0.41	0.29
	0.37
	0.38
G- GMP
SI	SI+HSPC
0.61	0.71
0.49	0.56
0.57	0.92
0.69	0.68
0.58	0.76
	0.61
H- Limb CFU (CFU/g tissue)
SI	SI+HSPC
210075758	192500000
244025000	209062500
196453333	364111111
146235294	112116667
475281250	105631579
283960000	94981481
78695122	330602564
5437500	134903704
53750000	2403226
52500000	2891304
18428571	6571429
163636364	4230769
4750000	2114754
48000000	3318182
26000000	46315789
	17551020
I- Flu viral copies
SI	SI+HSPC
51658.9	60062
43580.8	89523.4
54429.5	69069.2
12330.2	54459.1
67076.4	39435.1
5406.61	18358.1
35302.4	35356
18997.1	9653.11
8493.28	95831.9
10737.1	12368.6
19330.2	53458.2
J- Spleen CFU (CFU/ g tissue)
SI	SI+HSPC
685714	1810
242857	268750
467500	28889
3182	3375
38000	65833
17000	7778
650000	47500
79	7200
962963	1780
64674	41700
29706	700
14800	1150
1140	24900
600	890
7900
94000
1210
