# Supplementary material for: Hematopoietic stem and progenitor cells improve survival from sepsis by boosting immunomodulatory cells
Source: eLife. 2022 Feb 15;11:e74561. doi: 10.7554/eLife.74561 (PMC8846591; doi:10.7554/eLife.74561)
Supplement: Figure 6—source data 1. [file elife-74561-fig6-data1.xlsx]

## Sheet: Sheet1
BM data resprented as Cells/Bone
PB Data represented as % of PB
B- PB PMN-MDSCs					F- Cytokine Heatman
Naïve	GAS	GAS+HSPC				Naïve	Naïve	Naïve	Naïve	Naïve	Naïve	Naïve	GAS	GAS	GAS	GAS	GAS	GAS	GAS	GAS+HSPC	GAS+HSPC	GAS+HSPC	GAS+HSPC	GAS+HSPC
0.17	8.02	8.2			Eotaxin	736.96	868.48	413.64	664.89	144.76	174.34	118.66	377.33	181.47	436.37	274.71	324.89	398.5	362.46	106.12	610.29	374.11	364.59	292.21
0.59	10	9.96			G-CSF	259.43	601.2	292.78	154.4	77.11	200.09	188.16	17626.1	2351.72	18872.7	6839.68	19248.5	20039.7	3273.75	6327.63	7598.34	16975.4	2545.15	1431.73
0.18	10	6.9			GM-CSF	1.56	0	0	0	0	0	0	13.86	0	12.08	0	13.86	12.35	0	9.48	3.16	8.16	0	0
0.33	1.59	9.46			IFNγ	3.44	0.79	1.15	0.32	0	0	0.48	245.31	0	190.17	1	314.78	422.81	0	140.62	265.44	411.98	0	0
0.25	0.89				IL-1α	584.99	766.63	456.55	425.08	374.1	313.93	312.81	197.33	230.11	485.5	454.56	333.58	385.09	330.03	176.34	338	252.75	273.49	215.12
0.21					IL-1β	4.99	1.41	1.41	0	0.14	0	0	45.01	1.91	28.39	1.91	27.64	16.52	3.2	27.64	0.85	21.64	0.22	0
					IL-2	3.59	0	0	2.47	4.12	0	0	6.15	0.49	5.41	1.38	3.85	6.15	2.73	3.68	2.12	3.85	0.49	0.35
C- PB M-MDSCs					IL-3	0.05	0.57	0.18	0	0	0	0	0.98	0	2.54	0	1.16	0.68	0.04	0	0	0	0	0
1.12	0.64	1.88			IL-4	0.03	0.2	0.1	0	0.01	0	0.23	0.22	0	0.14	0	0.19	0.15	0.14	0	0.11	0.12	0.07	0.03
2.74	1.49	1.2			IL-5	7.31	7.55	2.72	1.44	2.72	8.96	8.24	7.96	5.13	22.05	3.92	28.45	23.35	11.62	5.77	1.59	9.61	6.93	7.46
2.14	1.38	2.27			IL-6	0.37	4.76	2.81	1.19	0.75	2.19	1.19	1537.23	110.21	3036.4	68.12	1410.05	2294.31	140.51	2912.01	330.19	994.69	80.59	61.3
2.73	1.21	1.11			IL-7	3.69	8.22	6.47	3.69	0	0.25	2.22	2.11	0	3.2	0	18.5	1.04	1.3	0	0	0.64	0	0
1.06	0.16	1.74			IL-9	31.31	12.59	10.88	6.5	10.66	6.92	15.78	25.57	9.77	0	11.63	0	0	8.37	0	0	0	21.18	8.37
2.21	0.46	2.17			IL-10	13.71	7.44	3.2	2.94	0	0	0	146.19	0	6.98	0	53.29	24.41	1.91	156.46	0.13	4.25	0	0
1.37	0.37				IL-12p40	5.4	11.99	10.53	16.32	8.78	10.03	11.91	18.73	0	26.65	2.23	10.02	27.9	4.68	0	8.37	9.2	0	0.62
					IL-12p70	46.06	4.99	3.2	0	0	0	0	61.21	2.01	93.46	2.61	46.41	100.63	9.78	11	11	69.89	0.82	3.79
D- BM PMN-MDSCs					IL-13	12.21	11.63	8.18	5.17	0.47	3.6	2.04	54.99	9.89	54.99	10.61	53.92	49.15	11.7	47.57	41.88	33.97	6.02	9.18
Naïve	GAS	GAS+HSPC			IL-15	38.88	4.58	21.71	1.08	0	0	11.85	48.32	0	32.62	5.94	48.32	28.37	28.37	0	0	3.2	0	0
24581.5	28173.6	162835			IL-17	1.03	1.4	0.5	0.5	0.3	0	0	29.14	0.83	25.62	3.62	28.29	18.83	2.58	2	4.94	8.62	1.25	1.07
23187	28983.6	100880			IP-10	74.39	75.44	72.73	57.66	25.2	29.43	42.8	760.72	32.79	1061.76	50.12	607.48	767.12	52.58	129.91	142.6	398.25	55.01	45.67
23531.8	36261	24463.8			KC	37.42	100.58	71.21	47.89	47.19	68.69	61.13	1127.82	126.48	2011.01	123.08	1739.14	1552.75	174.47	945.47	325.77	1337.24	169.02	75.67
29783.7	5341.05	77224.3			LIF	0.25	0.08	0.38	0.15	0.23	0	0	1.7	0	1.3	0	0.38	0.4	0	9.04	0	0	0	0
27866.9	505.238				LIX	6807.64	7661.61	5218.35	3884.87	2905.78	2691.97	2395.46	5286.7	4142.89	4718.55	6176.03	5407.5	2676.85	6952.11	1915.37	0	4713.35	6426.14	5053.36
21606.8					MCP-1	13.18	38.34	34.21	24.16	2.74	19.67	20.59	3752.7	45.89	3698.25	62.86	1227.84	1917.87	63.65	1634.95	147.69	1065.49	52.41	32.69
					M-CSF	8.68	5.94	5.94	6	0.83	1.47	2.67	6.03	2.16	22.99	0.64	9.19	11.23	1.14	5.43	3.2	4.86	0	2.67
E- BM M-MDSCs					MIG	152.64	182.57	153.03	267.21	147.23	196.23	210.08	1869.77	143.47	1226.93	91.58	1583.99	2076.85	86.94	868.69	550.83	1340.58	73.6	85.67
Naïve	GAS	GAS+HSPC			MIP-1α	120.1	62.74	22.54	28.46	28.46	32.88	0	497.35	69.1	302.5	60.24	653.33	720.74	43.09	504.75	66.6	316.7	40.02	33.14
697872	257399	347672			MIP-1B	61.69	14.87	55.11	0	4.6	10.24	28.05	748.7	26.42	517.41	51.99	624.55	794.09	41.75	369.87	69.85	386.72	61.04	54.67
607021	687964	755431			MIP-2	144.21	74.84	135.01	89.6	0	36.84	0	140.42	118.91	197.81	102.83	118.91	162.55	94.11	102.83	126.39	102.83	74.97	0
945030	267904	1.21102e+06			RANTES	61.42	68.25	47.38	26.41	20.02	24.22	51.94	55.94	7.2	47.74	15.77	34.01	45.84	14.43	30.79	12.48	24.18	8.61	7.92
814324	430551	505106			TNFα	0.14	5.18	7.66	3.71	4.76	6.01	5.02	83.87	5.17	163.92	4.27	46.37	76.27	5.78	3	6.83	27.33	2.2	4.13
635465	290796	867724			VEGF	0.3	0.56	0.3	0.34	0.61	0.61	0.55	0.64	0.39	0.57	0.27	0.6	0.58	0.23	0.31	0.21	0.44	0.14	0.11
504474	283404	633985
	810264	1.24416e+06
